# Supplementary material for: Metabolic memory of Δ9-tetrahydrocannabinol exposure in pluripotent stem cells and primordial germ cells-like cells
Source: eLife journal article supplement (doi:10.7554/elife.88795), 2023-07-13

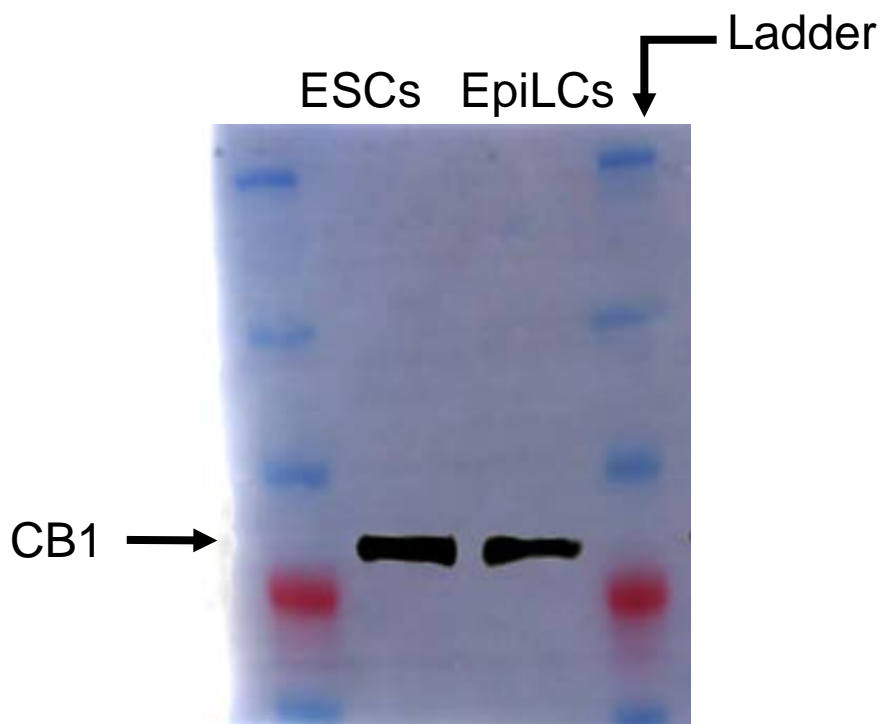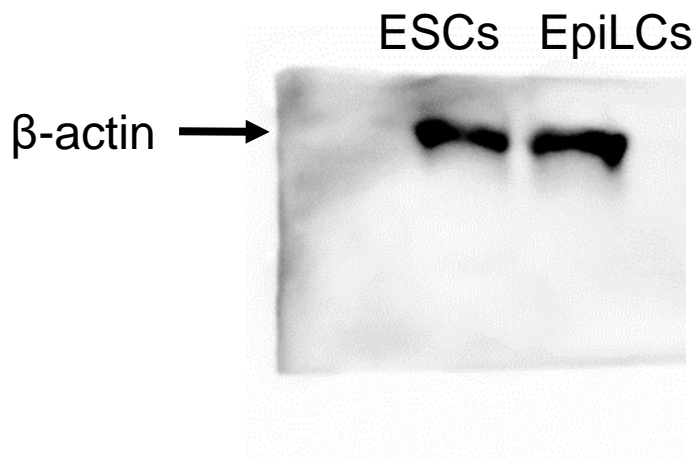

Supplement: fig2-data1 [file elife-88795-fig2-data1-v1.pdf]
