# Supplementary material for: Metabolic memory of Δ9-tetrahydrocannabinol exposure in pluripotent stem cells and primordial germ cells-like cells
Source: eLife. 2023 Dec 27;12:RP88795. doi: 10.7554/eLife.88795 (PMC10752584; doi:10.7554/eLife.88795)
Supplement: Supplementary file 1. [file elife-88795-supp1.xlsx]

## Sheet: ESCs
								Combat-seq adjusted counts
Function	Gene ID	Name	Ensembl Stable ID	log2FoldChange	pvalue	padj	-log10(p-adj)	ESCs-Vehicle-001	ESCs-Vehicle-002	ESCs-Vehicle-003	ESCs-100-001	ESCs-100-002	ESCs-100-003
DNA Methyltransferase	Dnmt1	Dna Methyltransferase (Cytosine-5) 1	ENSMUSG00000004099	0.00332262	0.94124	0.977631	0.00982508	17994	14237	15270	12497	16540	12786
DNA Methyltransferase	Dnmt3a	Dna Methyltransferase 3A	ENSMUSG00000020661	0.00998463	0.887791	0.956917	0.0191259	2321	1835	2149	1719	2270	1604
DNA Methyltransferase	Dnmt3b	Dna Methyltransferase 3B	ENSMUSG00000027478	-0.0445103	0.497948	0.732351	0.135281	2379	2164	2247	1885	2169	1730
5mC dioxygenase	Tet1	ten-eleven translocation 1	ENSMUSG00000047146	0.204829	0.00820127	0.076626	1.11562	15902	12034	11361	11011	15318	13258
5mC dioxygenase	Tet2	ten-eleven translocation 2	ENSMUSG00000040943	0.034478	0.566252	0.777421	0.109344	5499	4891	4580	4176	4901	4342
5mC dioxygenase	Tet3	ten-eleven translocation 3	ENSMUSG00000034832	0.0504286	0.672152	0.845949	0.0726558	559	559	471	471	483	483
Histone Acetyltransferase	Atf2	Activating Transcription Factor 2	ENSMUSG00000027104	0.160487	0.00828381	0.0771558	1.11263	3215	2688	2573	2487	3119	2689
Histone Acetyltransferase	Cdyl	Chromodomain Protein, Y Chromosome-Like	ENSMUSG00000059288	-0.0688023	0.276329	0.545808	0.26296	1736	1467	1467	1195	1482	1228
Histone Acetyltransferase	Crebbp	CREB-binding protein	ENSMUSG00000022521	0.191095	0.00934343	0.0829483	1.08119	2443	1878	1846	1755	2399	2011
Histone Acetyltransferase	Elp3	KAT9 elongator complex protein 3	ENSMUSG00000022031	0.0197827	0.673807	0.846904	0.072166	5184	4444	4501	3901	4768	3899
Histone Acetyltransferase	Ep300	p300	ENSMUSG00000055024	0.0779108	0.172894	0.423104	0.373552	5762	4459	4606	3989	5405	4332
Histone Acetyltransferase	Hat1	Histone Aminotransferase 1/Kat1	ENSMUSG00000027018	0.139897	0.00262143	0.0397104	1.4011	15210	11974	12704	11451	15235	11904
Histone Acetyltransferase	Kat2a	K(Lysine) Acetyltransferase 2A/GCN5	ENSMUSG00000020918	-0.127199	0.018443	0.121684	0.914765	5835	4782	5335	3985	5091	3776
Histone Acetyltransferase	Kat2b	K(Lysine) Acetyltransferase 2B/PCAF	ENSMUSG00000000708	0.0551607	0.29617	0.566835	0.246543	4493	3985	3956	3579	4222	3529
Histone Acetyltransferase	Kat5	K(Lysine) Acetyltransferase 5/TIP60	ENSMUSG00000024926	0.0321605	0.681043	0.851065	0.0700372	1026	803	890	732	979	733
Histone Acetyltransferase	Myst1	Myst Histone Acetyltransferase 1/Kat8	ENSMUSG00000030801	-0.177084	0.0293652	0.157876	0.801683	934	778	858	625	786	588
Histone Acetyltransferase	Myst2	Myst Histone Acetyltransferase 2/Kat7	ENSMUSG00000038909	-0.0350912	0.416151	0.668556	0.174862	11125	8986	9553	7687	9971	7771
Histone Acetyltransferase	Myst3	Myst Histone Acetyltransferase (Monocytic Leukemia) 3/Kat6A	ENSMUSG00000031540	0.14972	0.00402296	0.0512121	1.29063	4216	3479	3464	3263	4146	3443
Histone Acetyltransferase	Ncoa1	Nuclear Receptor Coactivator 1	ENSMUSG00000020647	-0.00889461	0.920376	0.970671	0.012928	979	910	826	751	839	771
Histone Acetyltransferase	Ncoa3	Nuclear Receptor Coactivator 3	ENSMUSG00000027678	-0.0139256	0.751537	0.890452	0.0503897	8212	6971	7016	5933	7324	6027
Histone Acetyltransferase	Ncoa6	Nuclear Receptor Coactivator 6	ENSMUSG00000038369	0.0621523	0.270038	0.540132	0.2675	3178	2636	2598	2315	2927	2455
Histone Deacetylase	Hdac1	Histone Deacetylase 1	ENSMUSG00000028800	-0.0319429	0.535425	0.757348	0.120704	11693	10408	10902	9127	10745	8493
Histone Deacetylase	Hdac2	Histone Deacetylase 2	ENSMUSG00000019777	0.0824737	0.0737262	0.267329	0.572954	7871	6603	7105	6256	7817	6012
Histone Deacetylase	Hdac3	Histone Deacetylase 3	ENSMUSG00000024454	-0.0166785	0.766415	0.896658	0.0473732	2821	2482	2522	2148	2556	2085
Histone Deacetylase	Hdac4	Histone Deacetylase 4	ENSMUSG00000026313	-0.123301	0.0970289	0.308531	0.510701	1366	1162	1107	885	1091	947
Histone Deacetylase	Hdac5	Histone Deacetylase 5	ENSMUSG00000008855	-0.307176	3.66066e-05	0.00366104	2.4364	1148	939	985	661	849	670
Histone Deacetylase	Hdac6	Histone Deacetylase 6	ENSMUSG00000031161	-0.112496	0.0217142	0.133096	0.875835	4483	3779	3807	2999	3728	3065
Histone Deacetylase	Hdac7	Histone Deacetylase 7	ENSMUSG00000022475	-0.260054	0.0177267	0.119163	0.923859	441	360	380	263	338	265
Histone Deacetylase	Hdac8	Histone Deacetylase 8	ENSMUSG00000067567	-0.208698	0.108598	0.32861	0.483319	338	336	332	262	272	230
Histone Deacetylase	Hdac10	Histone Deacetylase 10	ENSMUSG00000062906	-0.17752	0.323331	NA	#VALUE!	146	120	134	97	123	91
Histone Deacetylase	Hdac11	Histone Deacetylase 11	ENSMUSG00000034245	-0.629838	0.00601057	NA	#VALUE!	102	103	97	60	58	53
Histone Deacetylase	Sirt1	Sirtuin 1	ENSMUSG00000020063	0.185194	0.0096168	0.0849903	1.07063	3173	2412	2402	2255	3118	2581
Histone Deacetylase	Sirt2	Sirtuin 2	ENSMUSG00000015149	-0.0770875	0.393788	0.649531	0.1874	691	616	653	528	621	484
Histone Deacetylase	Sirt3	Sirtuin 3	ENSMUSG00000025486	0.18806	0.169373	0.417826	0.379005	269	208	205	193	266	222
Histone Deacetylase	Sirt4	Sirtuin 4	ENSMUSG00000029524	-0.0869777	0.665219	NA	#VALUE!	204	125	133	90	162	129
Histone Deacetylase	Sirt5	Sirtuin 5	ENSMUSG00000054021	-0.020522	0.907475	NA	#VALUE!	162	132	122	103	135	121
Histone Deacetylase	Sirt6	Sirtuin 6	ENSMUSG00000034748	0.103043	0.276208	0.545798	0.262968	873	629	682	576	838	645
Histone Deacetylase	Sirt7	Sirtuin 7	ENSMUSG00000025138	-0.0928386	0.491886	0.728729	0.137434	310	233	285	206	285	193
Histone Methyltransferase	Ash1l	(Absent, Small, Or Homeotic)-Like (Drosophila) K36me2	ENSMUSG00000028053	0.157606	0.071519	0.262728	0.580494	1318	1024	968	914	1240	1076
Histone Methyltransferase	Ash2l	Ash2 Like Histone Lysine Methyltransferase Complex Subunit	ENSMUSG00000031575	0.0691836	0.0752506	0.270187	0.568336	15376	12857	13252	11716	14686	11798
Histone Methyltransferase	Carm1	Coactivator-Associated Arginine Methyltransferase 1	ENSMUSG00000032185	-0.0493159	0.386269	0.643543	0.191423	4351	3433	3854	2994	3968	2932
Histone Methyltransferase	Dot1l	Dot1-Like, Histone H3 Methyltransferase (S. Cerevisiae)	ENSMUSG00000061589	-0.13825	0.0196054	0.125816	0.900266	3628	2814	2947	2187	2958	2341
Histone Methyltransferase	Ehmt1	Euchromatic Histone Methyltransferase 1/GLP	ENSMUSG00000036893	-0.0506883	0.335311	0.602122	0.220316	2952	2465	2537	2064	2591	2085
Histone Methyltransferase	Ehmt2	Euchromatic Histone Lysine N-Methyltransferase 2/G9A	ENSMUSG00000013787	-0.11069	0.0232596	0.137313	0.862289	6071	4855	5069	3880	5087	4035
Histone Methyltransferase	Ezh1	Enhancer of Zeste Homolog 1	ENSMUSG00000006920	-0.0454956	0.546229	0.765345	0.116143	1342	1096	1061	877	1130	963
Histone Methyltransferase	Ezh2	Enhancer of Zeste Homolog 2/KMT6	ENSMUSG00000029687	0.150749	0.00139344	0.0292874	1.53332	8191	6497	6893	6275	8288	6475
Histone Methyltransferase	Kmt2a	Lysine Methyltransferase 2A/MLL1	ENSMUSG00000002028	0.152543	0.0492867	0.211961	0.673745	2873	2117	2146	1937	2762	2250
Histone Methyltransferase	Kmt2b	Lysine Methyltransferase 2B/MLL2	ENSMUSG00000006307	-0.132405	0.012473	0.0981822	1.00797	5306	4290	4302	3301	4283	3531
Histone Methyltransferase	Kmt2c	Lysine Methyltransferase 2C/MLL3	ENSMUSG00000038056	0.0875945	0.148194	0.388043	0.41112	3010	2610	2485	2317	2795	2430
Histone Methyltransferase	Kmt2e	Lysine Methyltransferase 2E	ENSMUSG00000029004	0.0458665	0.573207	0.781434	0.107108	1675	1251	1263	1064	1499	1226
Histone Methyltransferase	Nsd1	Nuclear Receptor-Binding Set-Domain Protein 1	ENSMUSG00000021488	0.0729593	0.0909043	0.298977	0.524362	12671	10298	10573	9296	11991	9667
Histone Methyltransferase	Nsd2	Nuclear Receptor-Binding Set-Domain Protein 2	ENSMUSG00000057406	0.0254106	0.615998	0.807786	0.0927036	4223	3384	3569	2994	3916	3077
Histone Methyltransferase	Nsd3	Nuclear Receptor-Binding Set-Domain Protein 3	ENSMUSG00000054823	-0.00284823	0.968503	0.988385	0.00507371	1641	1389	1310	1141	1413	1238
Histone Methyltransferase	Prmt1	Protein Arginine N-Methyltransferase 1	ENSMUSG00000109324	0.0437731	0.454543	0.701571	0.153928	9694	7783	8973	7420	9662	6936
Histone Methyltransferase	Prmt2	Protein Arginine N-Methyltransferase 2	ENSMUSG00000020230	-0.309443	0.176351	NA	#VALUE!	94	97	106	78	77	56
Histone Methyltransferase	Prmt3	Protein Arginine N-Methyltransferase 3	ENSMUSG00000030505	-0.036302	0.529474	0.754284	0.122465	2371	2003	1998	1666	2067	1716
Histone Methyltransferase	Prmt5	Protein Arginine N-Methyltransferase 5	ENSMUSG00000023110	-0.0107305	0.841459	0.933824	0.0297347	7363	6368	6917	5751	6973	5304
Histone Methyltransferase	Prmt6	Protein Arginine N-Methyltransferase 6	ENSMUSG00000049300	0.149629	0.168373	0.416408	0.380481	404	323	336	308	405	322
Histone Methyltransferase	Prmt7	Protein Arginine N-Methyltransferase 7	ENSMUSG00000060098	-0.0308199	0.607373	0.803572	0.0949754	5253	4024	4576	3552	4840	3539
Histone Methyltransferase	Prmt8	Protein Arginine N-Methyltransferase 8	ENSMUSG00000030350	0.0333117	0.860355	NA	#VALUE!	119	113	109	100	110	96
Histone Methyltransferase	Prmd9	Protein Arginine N-Methyltransferase 9	ENSMUSG00000037134	0.0395038	0.574921	0.782503	0.106514	1220	1044	1113	960	1177	913
Histone Methyltransferase	Setd2	Set Domain Containing 2/KMT3A	ENSMUSG00000044791	0.13866	0.0108487	0.0908819	1.04152	7936	6345	6302	5834	7656	6364
Histone Methyltransferase	Setd3	Set Domain Containing 3	ENSMUSG00000056770	0.0108519	0.843045	0.93501	0.0291838	3685	3133	3397	2852	3516	2682
Histone Methyltransferase	Setd4	Set Domain Containing 4	ENSMUSG00000022948	0.0262959	0.846435	0.936314	0.0285783	312	228	237	192	279	223
Histone Methyltransferase	Setd5	Set Domain Containing 5	ENSMUSG00000034269	0.125828	0.0231673	0.13722	0.862581	12371	9430	9973	8817	12113	9497
Histone Methyltransferase	Setd6	Set Domain Containing 6	ENSMUSG00000031671	-0.0868481	0.199958	0.460462	0.336806	1470	1226	1333	1038	1305	992
Histone Methyltransferase	Setd7	Set Domain Containing (Lysine Methyltransferase) 7	ENSMUSG00000037111	-0.193856	0.0526719	0.220097	0.657385	614	562	523	412	469	420
Histone Methyltransferase	Setdb1	Set Domain, Bifurcated 1	ENSMUSG00000015697	0.00771706	0.872587	0.950458	0.0220671	5552	4837	4951	4263	5126	4149
Histone Methyltransferase	Setdb2	Set Domain, Bifurcated 2	ENSMUSG00000071350	0.103782	0.252145	0.519267	0.284609	666	588	559	530	629	548
Histone Methyltransferase	Smyd1	Set And Mynd Domain Containing 1	ENSMUSG00000055027	0.137383	0.628428	NA	#VALUE!	58	64	45	53	49	58
Histone Methyltransferase	Smyd3	Set And Mynd Domain Containing 3	ENSMUSG00000055067	-0.193515	0.0047433	0.0563289	1.24927	1443	1261	1309	977	1171	934
Histone Methyltransferase	Suv39h1	Suppressor Of Variegation 3-9 Homolog 1	ENSMUSG00000039231	0.107075	0.211615	0.474595	0.323677	799	618	655	573	777	609
Histone demethylase	Kdm1a	Lysine (K)-Specific Demethylase 1A	ENSMUSG00000036940	-0.0533942	0.305997	0.575086	0.240267	10622	9304	9972	8119	9719	7497
Histone demethylase	Kdm1b	Lysine (K)-Specific Demethylase 1B	ENSMUSG00000038080	0.0916151	0.253519	0.520583	0.28351	874	706	720	641	833	676
Histone demethylase	Kdm2a	Lysine (K)-Specific Demethylase 2A	ENSMUSG00000054611	0.0586309	0.238432	0.506036	0.295818	3577	2994	3146	2744	3436	2708
Histone demethylase	Kdm2b	Lysine (K)-Specific Demethylase 2B	ENSMUSG00000029475	-0.0809621	0.143011	0.379409	0.420892	2486	2085	2176	1728	2159	1714
Histone demethylase	Kdm3a	Lysine (K)-Specific Demethylase 3A	ENSMUSG00000053470	0.146296	0.00129342	0.0282043	1.54968	7986	6406	6828	6210	8111	6307
Histone demethylase	Kdm3b	Lysine (K)-Specific Demethylase 3B	ENSMUSG00000038773	0.00420163	0.921618	0.971229	0.0126784	9496	7789	8027	6741	8615	6921
Histone demethylase	Kdm4a	Lysine (K)-Specific Demethylase 4A	ENSMUSG00000033326	-0.1032	0.120399	0.346869	0.459834	4670	4328	4022	3390	3806	3413
Histone demethylase	Kdm4b	Lysine (K)-Specific Demethylase 4B	ENSMUSG00000024201	-0.00542304	0.96412	0.987185	0.00560127	1943	1160	1457	1028	1758	1210
Histone demethylase	Kdm4c	Lysine (K)-Specific Demethylase 4C	ENSMUSG00000028397	0.106926	0.0773606	0.274731	0.561092	3777	2874	3096	2682	3691	2845
Histone demethylase	Kdm5a	Lysine (K)-Specific Demethylase 5A/Jaridia	ENSMUSG00000030180	0.100285	0.0562056	0.228419	0.641267	3204	2652	2683	2431	3079	2519
Histone demethylase	Kdm5b	Lysine (K)-Specific Demethylase 5B	ENSMUSG00000042207	-0.0095755	0.842848	0.934897	0.0292363	19503	17467	17555	15169	17722	14633
Histone demethylase	Kdm5c	Lysine (K)-Specific Demethylase 5C/Jaridic	ENSMUSG00000025332	-0.159572	0.00131683	0.0283979	1.54671	12520	10414	10172	7805	9837	8322
Histone demethylase	Kdm6a	Kdm1 Lysine (K)-Specific Demethylase 6A/UTX	ENSMUSG00000037369	0.0454367	0.421165	0.672585	0.172253	4200	3628	3478	3137	3800	3282
Histone demethylase	Kdm6b	Kdm1 Lysine (K)-Specific Demethylase 6B	ENSMUSG00000018476	-0.206492	6.98047e-05	0.0055735	2.25387	3355	2759	2893	2088	2663	2103
Histone Phosphorylation	Aurka	Aurora Kinase A	ENSMUSG00000027496	-0.00200383	0.970086	0.988385	0.00507371	5646	4694	5199	4265	5375	4013
Histone Phosphorylation	Aurkb	Aurora Kinase B	ENSMUSG00000020897	-0.0851078	0.167329	0.414976	0.381977	3310	2526	2775	2093	2869	2171
Histone Phosphorylation	Aurkc	Aurora Kinase C	ENSMUSG00000070837	0.133763	0.115291	0.339738	0.468856	1180	871	1030	873	1232	871
Histone Phosphorylation	Nek6	Nima (Never In Mitosis Gene A)-Related Expressed Kinase 6	ENSMUSG00000026749	-0.0195101	0.826778	0.926894	0.03297	758	583	628	499	682	525
Histone Phosphorylation	Pak1	P21 (Cdkn1A)-Activated Kinase 1	ENSMUSG00000030774	-0.0476057	0.543147	0.763538	0.11717	1685	1568	1668	1396	1571	1220
Histone Phosphorylation	Rps6ka3	Ribosomal Protein S6 Kinase Polypeptide 3	ENSMUSG00000031309	0.0978561	0.0697796	0.258717	0.587176	2617	2227	2266	2064	2543	2070
Histone Phosphorylation	Rps6ka5	Ribosomal Protein S6 Kinase, Polypeptide 5	ENSMUSG00000021180	0.347467	0.00639192	0.0670741	1.17345	338	288	250	287	354	333
Histone Ubiquitination	Dzip3	Daz Interacting Protein 3, Zinc Finger	ENSMUSG00000064061	0.173434	0.114465	0.338525	0.470409	1866	1384	1211	1172	1676	1539
Histone Ubiquitination	Mysm1	Myb-Like, Swirm And Mpn Domains 1	ENSMUSG00000062627	0.144098	0.0865342	0.290851	0.53633	1440	1095	1072	983	1362	1145
Histone Ubiquitination	Rnf2	Ring Finger Protein 2	ENSMUSG00000026484	0.197663	6.27608e-05	0.00525981	2.27903	5045	4258	4214	4143	5145	4301
Histone Ubiquitination	Rnf20	Ring Finger Protein 20	ENSMUSG00000028309	0.134767	0.0275261	0.151905	0.818429	1805	1497	1511	1404	1775	1456
Histone Ubiquitination	Ube2a	Ubiquitin-Conjugating Enzyme E2A, Rad6 Homolog	ENSMUSG00000016308	-0.0349101	0.616557	0.808139	0.0925138	2125	1930	2052	1718	1982	1541
Histone Ubiquitination	Ube2b	Ubiquitin-Conjugating Enzyme E2B, Rad6 Homology	ENSMUSG00000020390	0.17654	0.0228299	0.135996	0.866475	1593	1174	1261	1135	1613	1248
Histone Ubiquitination	Usp16	Ubiquitin Specific Peptidase 16	ENSMUSG00000025616	0.108496	0.114518	0.338581	0.470338	1313	1095	1192	1062	1335	1015
Histone Ubiquitination	Usp21	Ubiquitin Specific Peptidase 21	ENSMUSG00000053483	-0.173836	0.00499444	0.058067	1.23607	1881	1572	1681	1240	1555	1204
Histone Ubiquitination	Usp22	Ubiquitin Specific Peptidase 22	ENSMUSG00000042506	-0.0174489	0.708004	0.864392	0.063289	5107	4235	4483	3688	4662	3648

## Sheet: EpiLCs
Function	Gene ID	Name(s)	Ensembl Stable ID	log2FoldChange	pvalue	padj	-log10(p-adj)	Combat-seq adjusted counts
								EpiLCs-Vehicle-001	EpiLCs-Vehicle-002	EpiLCs-Vehicle-003	EpiLCs-100-001	EpiLCs-100-002	EpiLCs-100-003
DNA Methyltransferase	Dnmt1	Dna Methyltransferase (Cytosine-5) 1	ENSMUSG00000004099	-0.169002	0.272234	0.760876	0.118686	9526	13017	7119	8604	6465	10285
DNA Methyltransferase	Dnmt3a	Dna Methyltransferase 3A	ENSMUSG00000020661	0.0708418	0.438857	0.855694	0.0676815	19431	23462	15187	19307	17319	22269
DNA Methyltransferase	Dnmt3b	Dna Methyltransferase 3B	ENSMUSG00000027478	-0.0279646	0.859987	0.972475	0.0121216	28187	33768	17315	22599	20034	31959
5mC dioxygenase	Tet1	ten-eleven translocation 1	ENSMUSG00000047146	0.315144	0.0162134	0.334704	0.475339	7435	10126	6254	10025	7754	10786
5mC dioxygenase	Tet2	ten-eleven translocation 2	ENSMUSG00000040943	0.45689	5.50806e-05	0.0210391	1.67697	1080	1257	765	1286	1199	1621
5mC dioxygenase	Tet3	ten-eleven translocation 3	ENSMUSG00000034832	0.0252487	0.875289	0.975921	0.0105852	492	699	420	566	413	601
Histone Acetyltransferase	Atf2	Activating Transcription Factor 2	ENSMUSG00000027104	0.0493316	0.720302	0.941895	0.0259974	2004	2400	1332	1771	1584	2353
Histone Acetyltransferase	Cdyl	Chromodomain Protein, Y Chromosome-Like	ENSMUSG00000031758	0.371476	0.029242	0.401916	0.395865	1599	1953	1032	1549	1344	2102
Histone Acetyltransferase	Crebbp	CREB-binding protein	ENSMUSG00000022521	0.161497	0.217225	0.724685	0.139851	2047	1982	1774	2003	2237	2086
Histone Acetyltransferase	Elp3	KAT9 elongator complex protein 3	ENSMUSG00000022521	-0.0664828	0.583276	0.901198	0.04518	4141	5437	3366	4081	3303	4535
Histone Acetyltransferase	Ep300	p300	ENSMUSG00000055024	0.252526	0.0511134	0.486891	0.312568	3357	4212	2411	3706	3136	4599
Histone Acetyltransferase	Hat1	Histone Aminotransferase 1=Kat1	ENSMUSG00000027018	-0.142647	0.203407	0.715779	0.145221	14545	17761	10637	12076	10618	14781
Histone Acetyltransferase	Kat2a	K(Lysine) Acetyltransferase 2A=GCN5	ENSMUSG00000020918	-0.0954041	0.315485	0.789263	0.102778	3817	4570	3331	3601	3289	3735
Histone Acetyltransferase	Kat2b	K(Lysine) Acetyltransferase 2B=PCAF	ENSMUSG00000000708	0.0818157	0.596055	0.906773	0.0425014	1761	2239	1188	1685	1388	2201
Histone Acetyltransferase	Kat5	K(Lysine) Acetyltransferase 5=TIP60	ENSMUSG00000024926	-0.212085	0.0777294	0.5474	0.261695	991	1220	742	800	698	960
Histone Acetyltransferase	Myst1	Myst Histone Acetyltransferase 1=Kat8	ENSMUSG00000030801	-0.20796	0.0226747	0.364071	0.438814	1190	1319	905	900	890	1069
Histone Acetyltransferase	Myst2	Myst Histone Acetyltransferase 2=Kat7	ENSMUSG00000038909	0.0178019	0.896752	0.980529	0.00853935	5598	7458	4298	5724	4494	6690
Histone Acetyltransferase	Myst3	Myst Histone Acetyltransferase (Monocytic Leukemia) 3 = Kat6A	ENSMUSG00000031540	0.324226	0.0171033	0.3369	0.472498	1727	2335	1401	2281	1772	2537
Histone Acetyltransferase	Ncoa1	Nuclear Receptor Coactivator 1	ENSMUSG00000020647	0.306972	0.00939323	0.264573	0.577455	378	407	309	419	428	465
Histone Acetyltransferase	Ncoa3	Nuclear Receptor Coactivator 3	ENSMUSG00000027678	0.137433	0.204749	0.717195	0.144363	2687	3313	2049	2798	2441	3299
Histone Acetyltransferase	Ncoa6	Nuclear Receptor Coactivator 6	ENSMUSG00000038369	0.139683	0.126421	0.620879	0.206993	1431	1626	1076	1393	1339	1668
Histone Deacetylase	Hdac1	Histone Deacetylase 1	ENSMUSG00000028800	-0.041725	0.668419	0.930094	0.031473	7920	9101	5690	6664	6309	8309
Histone Deacetylase	Hdac2	Histone Deacetylase 2	ENSMUSG00000019777	-0.00210845	0.978065	0.9967	0.00143575	6257	6768	5036	5573	5648	6261
Histone Deacetylase	Hdac3	Histone Deacetylase 3	ENSMUSG00000024454	-0.118993	0.209708	0.72007	0.142625	2571	2777	1816	1939	1970	2463
Histone Deacetylase	Hdac4	Histone Deacetylase 4	ENSMUSG00000026313	0.238491	0.0333771	0.41735	0.379499	911	1003	805	1032	1028	1055
Histone Deacetylase	Hdac5	Histone Deacetylase 5	ENSMUSG00000008855	-0.112441	0.310736	0.786414	0.104349	1066	1134	920	911	938	955
Histone Deacetylase	Hdac6	Histone Deacetylase 6	ENSMUSG00000031161	-0.0131253	0.867324	0.97434	0.0112897	3146	3569	2547	2883	2783	3220
Histone Deacetylase	Hdac7	Histone Deacetylase 7	ENSMUSG00000022475	0.444547	0.0514829	0.488038	0.311546	89	90	90	120	129	108
Histone Deacetylase	Hdac8	Histone Deacetylase 8	ENSMUSG00000067567	-0.287256	0.0201954	0.348453	0.457856	394	417	312	280	291	321
Histone Deacetylase	Hdac10	Histone Deacetylase 10	ENSMUSG00000062906	-0.0461906	0.804834	0.961908	0.0168667	133	139	118	119	126	122
Histone Deacetylase	Hdac11	Histone Deacetylase 11	ENSMUSG00000034245	0.167702	0.465448	0.867741	0.0616097	144	124	76	94	123	156
Histone Deacetylase	Sirt1	Sirtuin 1	ENSMUSG00000020063	0.140215	0.323176	0.795543	0.0993361	1616	2031	1123	1622	1364	2069
Histone Deacetylase	Sirt2	Sirtuin 2	ENSMUSG00000015149	-0.167859	0.215223	0.723636	0.14048	610	630	392	405	434	563
Histone Deacetylase	Sirt3	Sirtuin 3	ENSMUSG00000025486	-0.152155	0.373235	0.825752	0.0831504	319	270	224	197	256	258
Histone Deacetylase	Sirt4	Sirtuin 4	ENSMUSG00000029524	-0.110826	0.675889	0.931683	0.030732	160	149	182	155	175	117
Histone Deacetylase	Sirt5	Sirtuin 5	ENSMUSG00000054021	0.00918026	0.951465	0.990456	0.00416481	241	312	204	254	211	271
Histone Deacetylase	Sirt6	Sirtuin 6	ENSMUSG00000034748	-0.269847	0.0804843	0.553107	0.25719	699	734	419	419	442	618
Histone Deacetylase	Sirt7	Sirtuin 7	ENSMUSG00000025138	-0.36116	0.076654	0.545756	0.263002	303	237	184	137	198	212
Histone Methyltransferase	Ash1l	(Absent, Small, Or Homeotic)-Like (Drosophila) K36me2	ENSMUSG00000028053	0.333695	0.00251686	0.155513	0.808234	813	954	596	913	845	1116
Histone Methyltransferase	Ash2l	Ash2 Like Histone Lysine Methyltransferase Complex Subunit	ENSMUSG00000031575	0.00101578	0.990618	0.998259	0.000756553	10541	12445	8133	9737	8965	11372
Histone Methyltransferase	Carm1	Coactivator-Associated Arginine Methyltransferase 1	ENSMUSG00000032185	-0.160954	0.45612	0.863294	0.0638411	3669	5406	2470	3372	2149	4360
Histone Methyltransferase	Dot1l	Dot1-Like, Histone H3 Methyltransferase (S. Cerevisiae)	ENSMUSG00000061589	0.0651067	0.479198	0.873526	0.0587244	2759	3106	2006	2481	2407	3063
Histone Methyltransferase	Ehmt1	Euchromatic Histone Methyltransferase 1/GLP	ENSMUSG00000036893	0.100287	0.294161	0.775172	0.110602	3418	3625	2381	2937	3042	3780
Histone Methyltransferase	Ehmt2	Euchromatic Histone Lysine N-Methyltransferase 2/G9A	ENSMUSG00000013787	-0.138928	0.0732501	0.536041	0.270802	4907	5555	4019	4147	4012	4579
Histone Methyltransferase	Ezh1	Enhancer of Zeste Homolog 1	ENSMUSG00000006920	0.252446	0.00958666	0.267181	0.573194	1132	1275	830	1166	1131	1428
Histone Methyltransferase	Ezh2	Enhancer of Zeste Homolog 2/KMT6	ENSMUSG00000029687	0.103626	0.260209	0.754903	0.122109	7097	7044	5431	6214	6847	7346
Histone Methyltransferase	Kmt2a	Lysine Methyltransferase 2A/MLL1	ENSMUSG00000002028	0.274304	0.00263187	0.157659	0.802282	2568	2593	1875	2481	2696	3065
Histone Methyltransferase	Kmt2b	Lysine Methyltransferase 2B/MLL2	ENSMUSG00000006307	0.0714832	0.456619	0.863662	0.0636561	3067	3772	2541	3203	2826	3498
Histone Methyltransferase	Kmt2c	Lysine Methyltransferase 2C/MLL3	ENSMUSG00000038056	0.358254	0.000224028	0.0477653	1.32089	1502	1606	1261	1752	1796	1888
Histone Methyltransferase	Kmt2e	Lysine Methyltransferase 2E	ENSMUSG00000029004	0.210272	0.15239	0.658595	0.181382	1258	1329	1213	1448	1495	1344
Histone Methyltransferase	Nsd1	Nuclear Receptor-Binding Set-Domain Protein 1	ENSMUSG00000021488	0.0725586	0.528699	0.8873	0.0519293	1258	1329	1213	1448	1495	1344
Histone Methyltransferase	Nsd2	Nuclear Receptor-Binding Set-Domain Protein 2	ENSMUSG00000057406	0.171217	0.182688	0.697485	0.156465	2728	3629	2202	3190	2533	3565
Histone Methyltransferase	Nsd3	Nuclear Receptor-Binding Set-Domain Protein 3	ENSMUSG00000054823	0.208858	0.0192191	0.342715	0.465067	1254	1361	1013	1298	1312	1454
Histone Methyltransferase	Prmt1	Protein Arginine N-Methyltransferase 1	ENSMUSG00000109324	-0.256939	0.00393103	0.188534	0.724611	16760	19984	12955	13056	11881	15219
Histone Methyltransferase	Prmt2	Protein Arginine N-Methyltransferase 2	ENSMUSG00000020230	-0.31576	0.0174632	0.338337	0.470651	415	528	350	343	291	370
Histone Methyltransferase	Prmt3	Protein Arginine N-Methyltransferase 3	ENSMUSG00000030505	-0.0710367	0.444047	0.856664	0.0671893	2567	2870	1857	2083	2037	2585
Histone Methyltransferase	Prmt5	Protein Arginine N-Methyltransferase 5	ENSMUSG00000023110	-0.123648	0.174148	0.690684	0.16072	7069	8209	5250	5779	5414	6993
Histone Methyltransferase	Prmt6	Protein Arginine N-Methyltransferase 6	ENSMUSG00000049300	0.0204071	0.891793	0.980462	0.00856928	397	445	256	321	312	440
Histone Methyltransferase	Prmt7	Protein Arginine N-Methyltransferase 7	ENSMUSG00000060098	-0.145973	0.166161	0.681466	0.166556	4345	5515	3629	4016	3409	4350
Histone Methyltransferase	Prmt8	Protein Arginine N-Methyltransferase 8	ENSMUSG00000030350	0.17065	0.669915	0.930366	0.0313462	18	31	20	30	19	26
Histone Methyltransferase	Prmd9	Protein Arginine N-Methyltransferase 9	ENSMUSG00000037134	-0.0623295	0.56303	0.895342	0.0480112	1113	1386	919	1067	927	1169
Histone Methyltransferase	Setd2	Set Domain Containing 2/KMT3A	ENSMUSG00000044791	0.182974	0.120197	0.614429	0.211528	4078	5143	3086	4440	3756	5265
Histone Methyltransferase	Setd3	Set Domain Containing 3	ENSMUSG00000056770	0.0255447	0.758739	0.948521	0.0229528	3399	3588	2495	2858	2972	3508
Histone Methyltransferase	Setd4	Set Domain Containing 4	ENSMUSG00000022948	0.202043	0.206605	0.719186	0.143159	421	397	373	423	483	430
Histone Methyltransferase	Setd5	Set Domain Containing 5	ENSMUSG00000034269	0.119672	0.149594	0.656006	0.183092	7742	9170	6175	7946	7303	8996
Histone Methyltransferase	Setd6	Set Domain Containing 6	ENSMUSG00000031671	-0.149887	0.405206	0.843906	0.0737057	1773	1380	1436	1177	1554	1319
Histone Methyltransferase	Setd7	Set Domain Containing (Lysine Methyltransferase) 7	ENSMUSG00000037111	0.185636	0.19235	0.703753	0.15258	2376	3093	1724	2594	2088	3185
Histone Methyltransferase	Setdb1	Set Domain, Bifurcated 1	ENSMUSG00000015697	0.0367466	0.688602	0.935023	0.0291775	3611	4228	2722	3350	3111	3998
Histone Methyltransferase	Setdb2	Set Domain, Bifurcated 2	ENSMUSG00000071350	-0.162681	0.373327	0.825824	0.0831127	319	413	215	262	209	342
Histone Methyltransferase	Smyd1	Set And Mynd Domain Containing 1	ENSMUSG00000055027	0.048507	0.86954	0.974849	0.0110626	42	52	48	52	48	43
Histone Methyltransferase	Smyd3	Set And Mynd Domain Containing 3	ENSMUSG00000055067	0.0280063	0.838764	0.96781	0.0142101	544	666	526	606	545	567
Histone Methyltransferase	Suv39h1	Suppressor Of Variegation 3-9 Homolog 1	ENSMUSG00000039231	-0.0618849	0.469617	0.869682	0.0606393	1555	1685	1183	1281	1298	1522
Histone demethylase	Kdm1a	Lysine (K)-Specific Demethylase 1A	ENSMUSG00000036940	-0.0276782	0.827783	0.965329	0.0153245	7062	9288	5531	7005	5622	8048
Histone demethylase	Kdm1b	Lysine (K)-Specific Demethylase 1B	ENSMUSG00000038080	0.0918179	0.531372	0.888017	0.0515788	540	607	344	457	442	631
Histone demethylase	Kdm2a	Lysine (K)-Specific Demethylase 2A	ENSMUSG00000054611	0.123956	0.236863	0.737436	0.132276	3514	3860	3115	3682	3674	3750
Histone demethylase	Kdm2b	Lysine (K)-Specific Demethylase 2B	ENSMUSG00000029475	0.214076	0.11393	0.607562	0.21641	2269	2725	1520	2264	2018	2985
Histone demethylase	Kdm3a	Lysine (K)-Specific Demethylase 3A	ENSMUSG00000053470	0.208007	0.0729994	0.536041	0.270802	3377	3459	2186	2914	3135	4007
Histone demethylase	Kdm3b	Lysine (K)-Specific Demethylase 3B	ENSMUSG00000038773	0.127097	0.194958	0.706283	0.151021	2514	2922	1844	2429	2272	2971
Histone demethylase	Kdm4a	Lysine (K)-Specific Demethylase 4A	ENSMUSG00000033326	-0.0235847	0.8681	0.974606	0.011171	3174	4190	2356	3071	2430	3696
Histone demethylase	Kdm4b	Lysine (K)-Specific Demethylase 4B	ENSMUSG00000024201	-0.0766979	0.440674	0.855849	0.0676031	1271	1541	1040	1177	1054	1300
Histone demethylase	Kdm4c	Lysine (K)-Specific Demethylase 4C	ENSMUSG00000028397	0.0468736	0.741802	0.945623	0.024282	4856	6283	3473	4753	3848	5910
Histone demethylase	Kdm5a	Lysine (K)-Specific Demethylase 5A/Jaridia	ENSMUSG00000030180	0.373643	0.0112432	0.287474	0.541401	2553	2209	2073	2588	3170	2886
Histone demethylase	Kdm5b	Lysine (K)-Specific Demethylase 5B	ENSMUSG00000042207	0.0119034	0.922532	0.985393	0.00639042	10830	14180	8595	11089	8973	12589
Histone demethylase	Kdm5c	Lysine (K)-Specific Demethylase 5C/Jaridic	ENSMUSG00000025332	-0.113622	0.401303	0.841822	0.0747797	6366	8714	5275	6346	4858	6924
Histone demethylase	Kdm6a	Kdm1 Lysine (K)-Specific Demethylase 6A/UTX	ENSMUSG00000037369	0.253427	0.186026	0.700626	0.154514	2251	2739	1269	2124	1823	3195
Histone demethylase	Kdm6b	Kdm1 Lysine (K)-Specific Demethylase 6B	ENSMUSG00000018476	0.0471929	0.603234	0.90856	0.0416465	2754	3269	2347	2808	2585	2981
Histone Phosphorylation	Aurka	Aurora Kinase A	ENSMUSG00000027496	-0.148178	0.16576	0.681153	0.166756	5092	6445	4112	4594	3898	5136
Histone Phosphorylation	Aurkb	Aurora Kinase B	ENSMUSG00000020897	-0.00122355	0.989259	0.997984	0.000876343	2817	2931	2281	2456	2586	2744
Histone Phosphorylation	Aurkc	Aurora Kinase C	ENSMUSG00000070837	-0.262722	0.10455	0.590094	0.229079	269	280	173	167	179	235
Histone Phosphorylation	Nek6	Nima (Never In Mitosis Gene A)-Related Expressed Kinase 6	ENSMUSG00000026749	0.0775858	0.527885	0.8873	0.0519293	820	831	703	771	831	814
Histone Phosphorylation	Pak1	P21 (Cdkn1A)-Activated Kinase 1	ENSMUSG00000030774	-0.113712	0.169006	0.682975	0.165595	2331	2653	1805	1941	1865	2261
Histone Phosphorylation	Rps6ka3	Ribosomal Protein S6 Kinase Polypeptide 3	ENSMUSG00000031309	0.16492	0.175131	0.691229	0.160378	1704	2085	1229	1740	1524	2155
Histone Phosphorylation	Rps6ka5	Ribosomal Protein S6 Kinase, Polypeptide 5	ENSMUSG00000021180	0.188675	0.125817	0.620879	0.206993	489	474	365	439	497	532
Histone Ubiquitination	Dzip3	Daz Interacting Protein 3, Zinc Finger	ENSMUSG00000064061	0.46055	0.000325648	0.0525519	1.27941	1090	1193	703	1176	1174	1609
Histone Ubiquitination	Mysm1	Myb-Like, Swirm And Mpn Domains 1	ENSMUSG00000062627	0.360098	0.000189273	0.0440043	1.3565	905	1068	735	1107	1023	1232
Histone Ubiquitination	Rnf2	Ring Finger Protein 2	ENSMUSG00000026484	0.0826955	0.575139	0.900385	0.0455716	2523	3174	1712	2403	2010	3126
Histone Ubiquitination	Rnf20	Ring Finger Protein 20	ENSMUSG00000028309	0.115308	0.375387	0.826717	0.0826429	1526	1384	1000	1144	1386	1572
Histone Ubiquitination	Ube2a	Ubiquitin-Conjugating Enzyme E2A, Rad6 Homolog	ENSMUSG00000016308	-0.119346	0.211139	0.72007	0.142625	1810	1825	1393	1375	1496	1619
Histone Ubiquitination	Ube2b	Ubiquitin-Conjugating Enzyme E2B, Rad6 Homology	ENSMUSG00000020390	0.177423	0.262263	0.755513	0.121758	2623	2188	2127	2271	2858	2538
Histone Ubiquitination	Usp16	Ubiquitin Specific Peptidase 16	ENSMUSG00000025616	0.204883	0.0612582	0.515699	0.287604	1149	1128	798	1004	1125	1302
Histone Ubiquitination	Usp21	Ubiquitin Specific Peptidase 21	ENSMUSG00000053483	-0.141528	0.186309	0.701013	0.154274	1548	1529	1233	1170	1294	1332
Histone Ubiquitination	Usp22	Ubiquitin Specific Peptidase 22	ENSMUSG00000042506	0.0376735	0.803643	0.961665	0.0169762	4295	5816	3200	4437	3379	5317
